# Supplementary material for: MamF-like proteins are distant Tic20 homologs involved in organelle assembly in bacteria
Source: Springer Nature journal article supplement (doi:10.1038/s41467-024-55121-0), 2024-12-09
Supplement: MOESM1 [file 41467_2024_55121_MOESM1_ESM.pdf]

# Supplementary Information

## **MamF-like proteins are distant Tic20 homologs involved in organelle assembly in bacteria**

Anja Paulus<sup>1</sup>, Frederik Ahrens<sup>1</sup>, Annika Schraut<sup>1</sup>, Hannah Hofmann<sup>1</sup>, Tim Schiller<sup>1</sup>, Thomas Sura<sup>3</sup>, Dörte Becher<sup>3</sup>, René Uebe<sup>1,\*</sup>

### **Affiliations:**

<sup>1</sup>Department of Microbiology, University of Bayreuth; Bayreuth, Germany.

<sup>2</sup>Microbial Proteomics, Institute of Microbiology, University of Greifswald; Greifswald, Germany.

\*Corresponding author. Email: rene.uebe@uni-bayreuth.de

### **This PDF file includes:**

Supplementary Note 1  
Supplementary Figures 1-5  
Supplementary Tables 1-4

### **Other Supplementary Materials for this manuscript include the following:**

Supplementary Data 1-5  
Source data file

## Supplementary Note 1

### Altered composition of the MM in MFP mutants

In addition to the eleven proteins that showed a significantly decreased abundance in MM fractions of strain  $\Delta F3$ , our quantitative proteomic analyses also revealed that 26 proteins are significantly enriched compared to the WT (**Supplementary Data Table 4**). Among these proteins, the three MAPs MamC, MamW, and MamX showed a three-fold increase (**Fig. 3d**). While increased MamC levels could be confirmed by Western immunoblots (**Supplementary Fig. 5a**), the deletion of *mamC* or *mamW* had only very weak effects on magnetosome formation<sup>1,2</sup>. Since MamX, on the other hand, plays a role in magnetosome redox control<sup>3</sup>, the enrichment of these MAPs does not seem to play a role for the  $\Delta F3$  phenotype. Beside these MAPs, 23 significantly enriched proteins have no known function in magnetosome biomineralization and are encoded outside the genomic magnetosome island that contains almost all MAP genes<sup>2</sup>. Strikingly, 13 of these proteins contain predicted secretory N-terminal signal sequences (SignalP 5.0) (**Supplementary Data Table 4**)<sup>4</sup> and thus likely reside within the periplasm or the outer membrane. To test for a putative role in magnetosome biogenesis, we fluorescently labeled three of the most strongly enriched proteins (**Supplementary Fig. 5b, c**). When produced in the WT, all proteins showed a peripheral cell localization, whereas mCherry-labeled MmeA, a MAP with a known N-terminal signal peptide<sup>5</sup>, showed a magnetosome chain-like localization pattern. Thus, at least the tested proteins (MSR-1\_01270, MSR-1\_09970, MSR-1\_21580) do not localize to the MM *in vivo*. We thus concluded that only proteins with a decreased abundance in  $\Delta F3$  MM extracts are relevant for our analyses.

Supplementary Figures

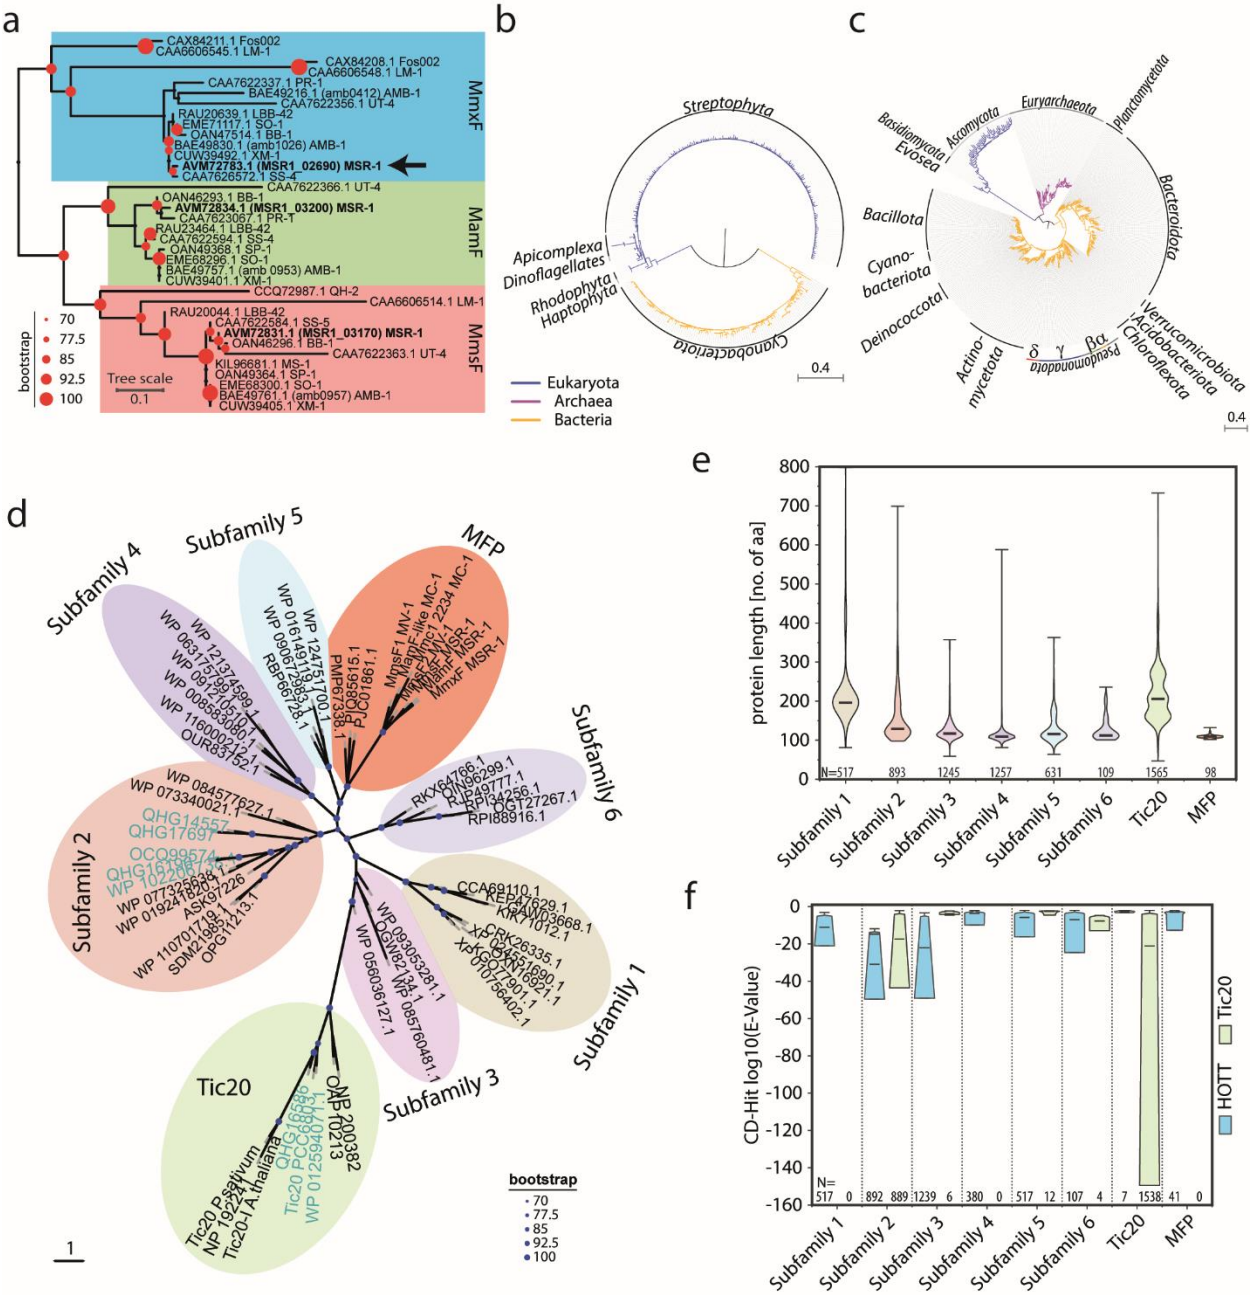

**Supplementary Figure 1. MFPs are members of a common Tic20/HOTT protein superfamily, which are distributed in all domains of life.** **a** A phylogenetic analysis of various MFPs reveals that one of the newly identified magnetosome proteins (MSR1\_02690) is an ortholog of MmxF (amb1026) from *Magnetosprillum magneticum* AMB-1<sup>14</sup>. The tree is based on 36 MFPs sequences from different magnetotactic bacteria inferred under the best-fitting LG+G4 substitution model. Grouped MmxF, MamF and MmsF homologs are shaded with blue, green, and red boxes, respectively. MSR-1 MFPs are highlighted in bold and MmxF is marked with an arrow. Red dots above branches are bootstrap values in percent, denoted in the legend. Scale bar represents expected substitutions per site. Accession numbers are listed in **Supplementary Data 1**. **b** A phylogenetic analysis reveals a narrow distribution of the Tic20 family. The phylogenetic tree is based on 16S/18S rRNA sequences from 297 organisms containing at least one Tic20 family protein. The tree was inferred under the best-fitting TIM3+F+R3 substitution model. Scale bar represents expected substitutions per site. **c** A phylogenetic analysis reveals the wide distribution of the HOTT family in all domains of life. The phylogenetic tree is based on 16S/18S rRNA sequences from 456 organisms containing at least one HOTT family protein. The tree was inferred under the best-fitting GTR+F+R10 substitution model. Scale bar represents expected substitutions per site. **d** Unrooted phylogenetic tree of the Tic20/HOTT superfamily inferred under the best-fitting mtInv+F+I+G4 substitution model. The MFPs and six other HOTT groups form distinct subfamilies within the HOTT family that is widely separated from the Tic20 family. HOTT subfamily 1 exclusively includes eukaryotic sequences whereas subfamilies 2–6 contain only prokaryotic representatives. Cyanobacteria (in teal) are the only organisms containing HOTT (subfamily 2) and Tic20 family proteins. Bootstrap values (blue dots) are denoted in the legend. Scale bar represents expected substitutions per site. Accession numbers are listed in **Supplementary Data 1**. **e** Comparison of protein length distributions (in aa) in the Tic20/HOTT superfamily using violin plots. Please note the short length of most HOTT family members in comparison to Tic20. The min, max, and mean values are indicated by bars. The number of analyzed proteins of each group [N] is given below. **f** Conserved domain (CD) search analysis of the Tic20/HOTT superfamily using violin plots. Almost all representatives of the HOTT Subfamily 2 retrieve significant E-values to both protein families, HOTT and Tic20. Only hits with E-values < than  $10^{-3}$  are shown. The min, max, and mean values are indicated by bars. The number of proteins with hits to each protein domain [N] is given below. **a, d, e, f** Source data are provided as a Source Data file.

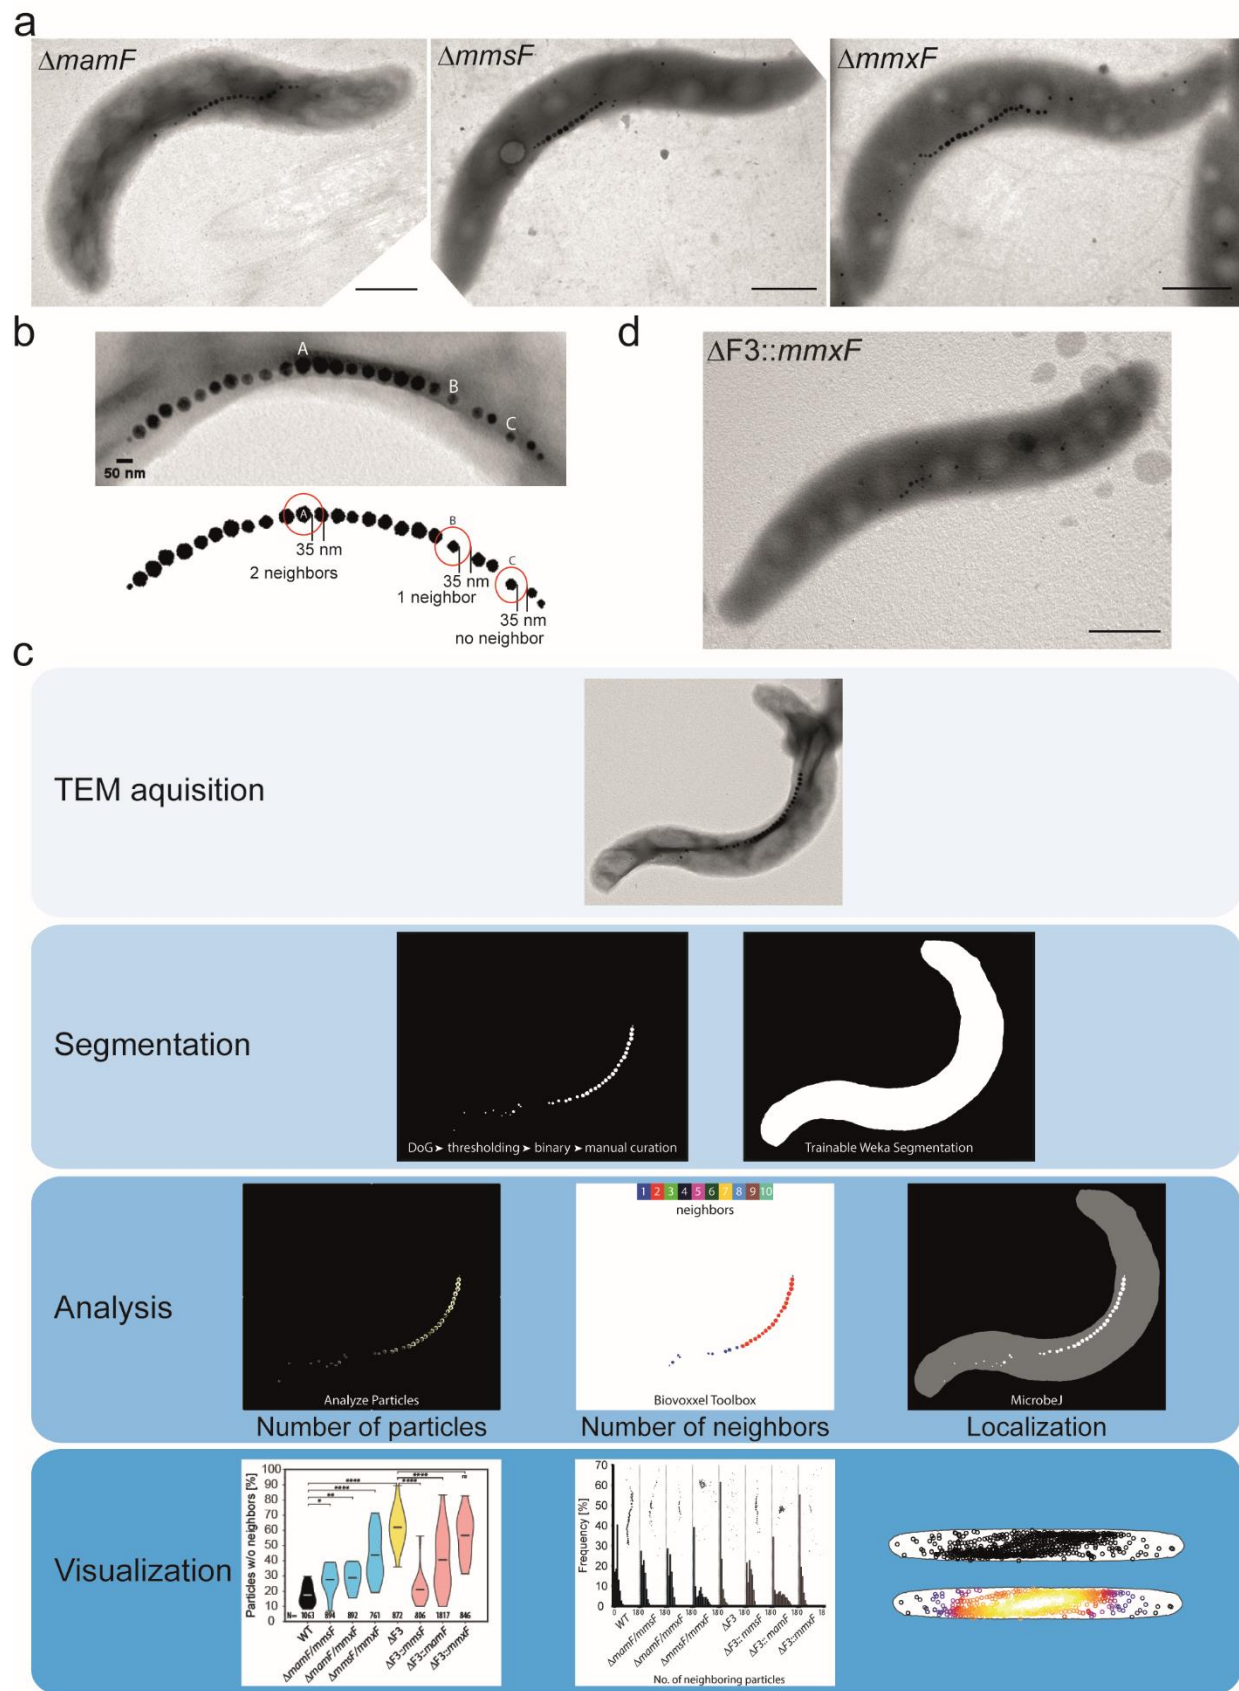

**Supplementary Figure 2. Characterization of MSR-1 deletion phenotypes using quantitative magnetosome neighbor analysis.** **a** Representative TEM micrographs of MFP single deletions show WT-like phenotypes. (Scale bars: 500 nm). **b** MSR-1 WT magnetosomes with an average size of 35 nm are arranged in almost perfect chain-like structures in which most particles have exactly two neighboring particles within a distance of 35 nm (see particle A). Exceptions can be found at the end of chains where a wider particle spacing can be observed (e.g. particle B that has only one neighboring particle within 35 nm) or particle C that has no neighbor. In the absence of magnetosome chains the frequency of neighbor-less particles increases strongly while strains with aggregated magnetosomes frequently have neighbor numbers  $\geq 3$ . **c** For quantitative magnetosome neighbor analysis images of different mutant strains were collected by TEM. Micrographs were subsequently segmented into magnetosomes and cell bodies. Segmented binary images were then used to analyze the overall number of magnetosomes per cell, the number of neighboring magnetosomes of each individual particle and the distribution of intracellular magnetosome localizations using Fiji plugins. Visualization of the results was performed using Fit-o-mat 0.752 <sup>6</sup>, Prism 7 (GraphPad Prism Software Inc., San Diego, California), and MicrobeJ <sup>7</sup>. **d** Expression of *mmxF* in  $\Delta F3$  results in phenotypic heterogeneity (compare with  $\Delta F3::mmxF$  TEM image in **Fig. 2c**) which may derive from an unbalanced production of MmxF or an impaired folding due to the use of the strong *mamG* promoter.



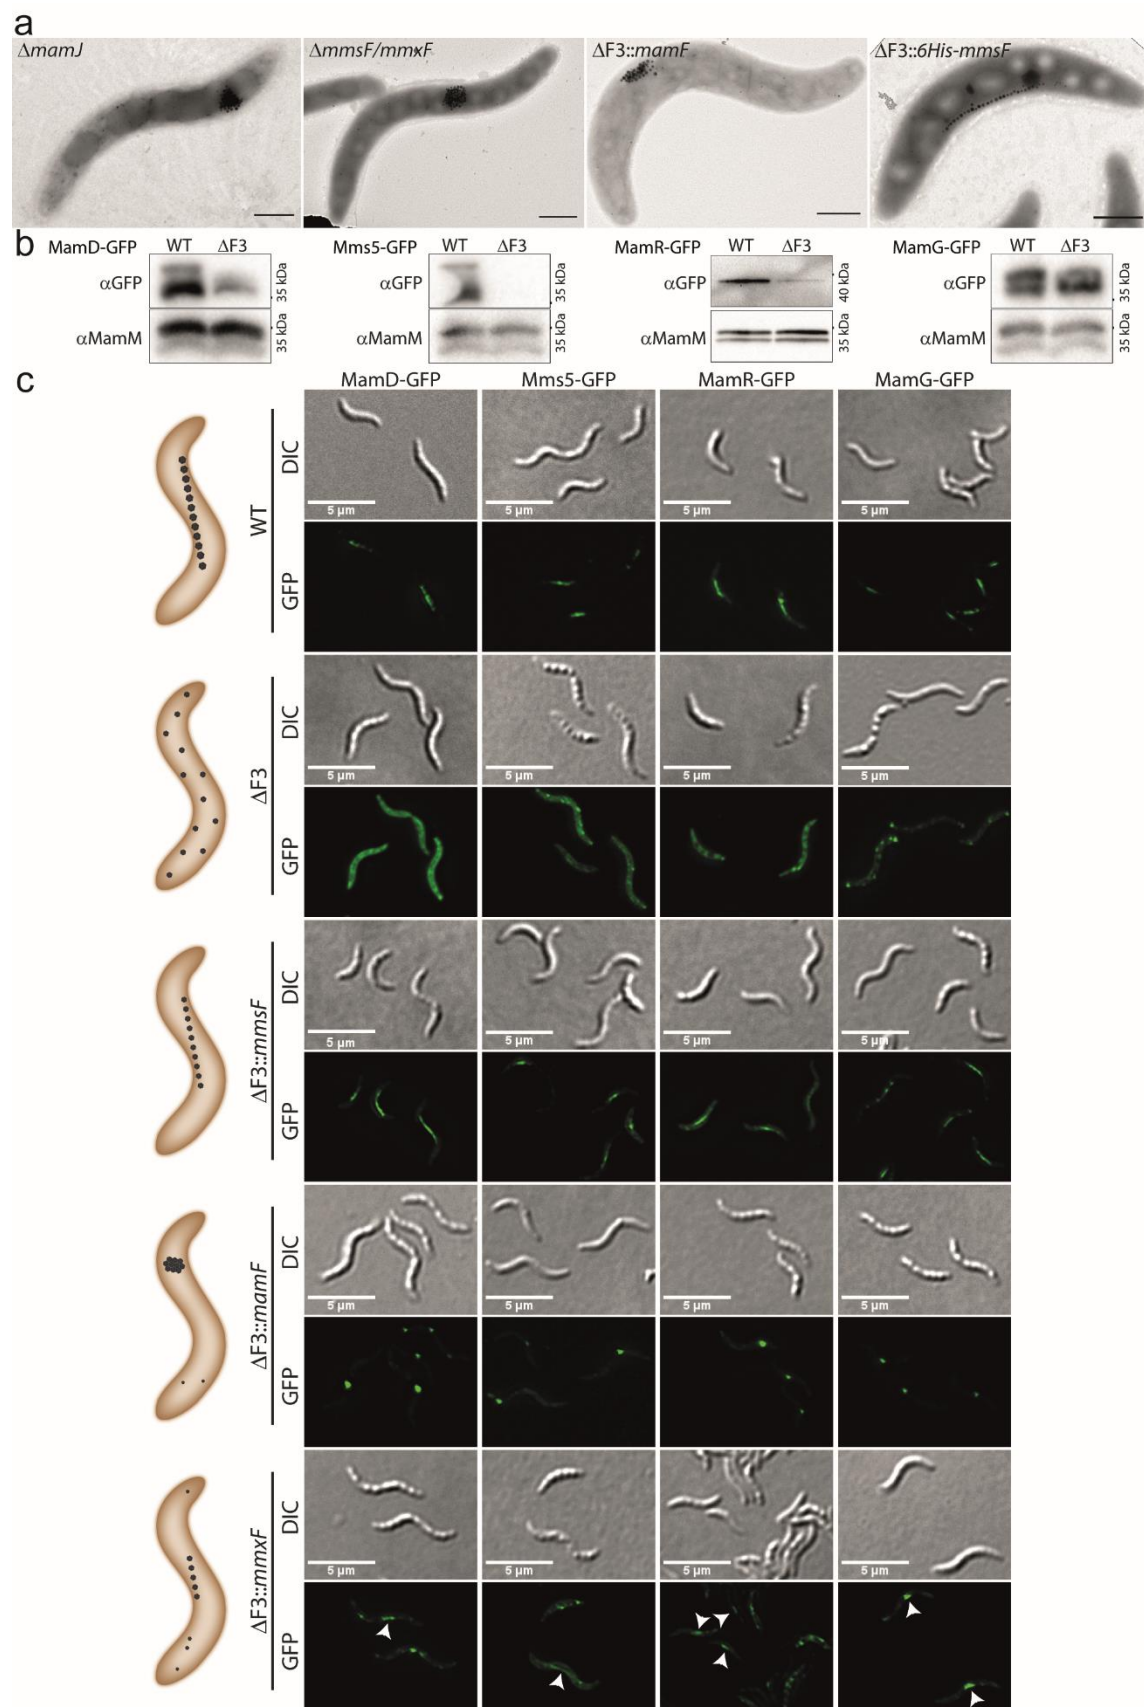

**Supplementary Figure 3. Verification of the  $\Delta F3$  proteome analysis.** **a** MSR-1 mutants expressing *mamF* as the only MFP gene phenocopy the *mamJ* deletion mutant whereas  $\Delta F3$  expressing a *6His-mmsF* construct phenocopies strain  $\Delta F3::mmsF$  (compare **Fig. 2c**). Representative TEM micrographs of  $\Delta mamJ$ ,  $\Delta mmsF/mmxF$ ,  $\Delta F3::mamF$ , and  $\Delta F3::mmsF$ . (Scale bars: 500 nm). **b** Western blot analyses ( $\alpha$ GFP) of magnetosome membrane fractions from WT and  $\Delta F3$  strains expressing *mamG*-, *mamD*-, *mms5*-, and *mamR-GFP* confirm a strong reduction of MamD, Mms5, and MamR in  $\Delta F3$  magnetosomes compared to the WT. In contrast, MamG-GFP is equally abundant in both strains. Source data are provided as a Source Data file. **c** Schematic phenotypic models and epifluorescence imaging of WT,  $\Delta F3$ , and complemented  $\Delta F3$  strains producing MamD-, Mms5-, MamR-, or MamG-GFP fusion proteins reveals MM targeting of MamD-, Mms5-, and MamR-GFP by all three MFPs. In  $\Delta F3$ , MamD-, MamR-, and partially Mms5-GFP show only a soluble localization whereas MamG-GFP exclusively localizes in a punctuate pattern. Arrowheads indicate cells with midcell chain-like fluorescence patterns in  $\Delta F3::mmxF$ . DIC, differential interference contrast image. (Scale bars: 5  $\mu$ m)



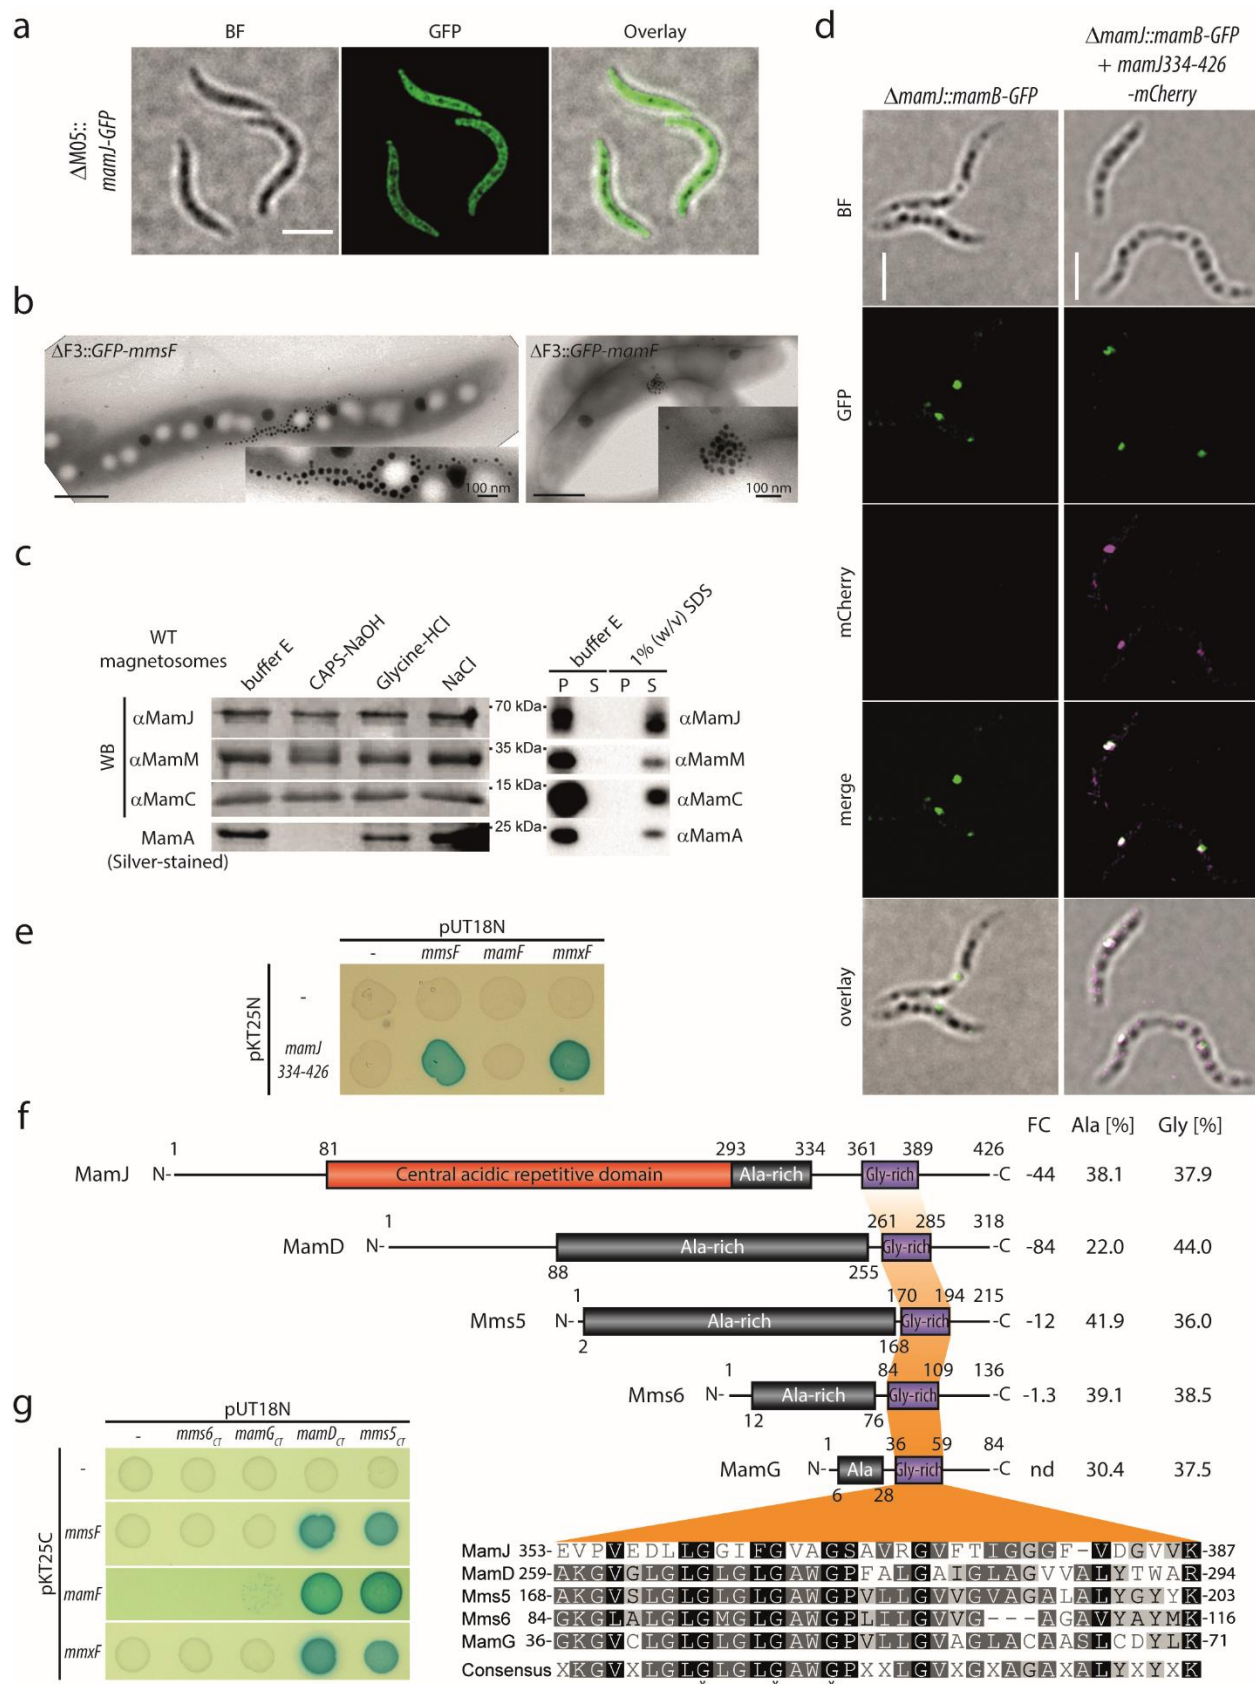

**Supplementary Figure 4. Characterization of potential MFP substrate proteins.** **a** 3D-Structured illumination microscopy of MamJ-GFP reveals a soluble localization pattern in the MSR-1  $\Delta$ M05 mutant that lacks all magnetosome genes. BF, bright field image. (Scale bars: 2  $\mu$ m) **b** GFP-labeled MmsF and MamF are functional. Complementation of  $\Delta$ F3 with *GFP-mmsF* or *GFP-mamF* results in similar phenotypes as complementation with unlabeled genes (compare with **Fig. 2c**). (Scale bars: 500 nm). **c** MamJ is resistant to prolonged treatments (20 h) with basic (0.1 M N-cyclohexyl-3-aminopropanesulfonic acid (CAPS), pH 11), acidic (0.1 M glycine, pH 2.5), or high salt (1 M NaCl, 10 mM Hepes, 1 mM EDTA, pH 7.4) buffer solutions. Magnetosome pellet fractions were loaded on SDS-PAGE and subsequently analyzed by Western blot ( $\alpha$ MamJ,  $\alpha$ MamM,  $\alpha$ MamC) or silver staining (MamA). In an independent experiment, magnetosomes were incubated for one hour in 1% SDS as a positive control. The sample was fractionated into supernatant and magnetosome pellets by centrifugation. Trichloroacetic acid-precipitated supernatant and pellet fractions were loaded onto SDS-PAGE. Subsequent Western blot immunodetections of MamJ, MamM, and MamC indicate an integral membrane protein behavior for all three proteins as they could be only extracted by SDS. Contrarily, the MM associated protein MamA could be readily extracted by SDS and CAPS-buffer treatments. Buffer E treatments served as negative controls. Source data are provided as a Source Data file. **d** 3D-Structured illumination colocalization microscopy of MamB-GFP and MamJ334-426-mCherry in  $\Delta$ *mamJ* indicate that residues 334-426 mediate MM targeting of MamJ (see also **Fig. 4**). Micrographs are maximum intensity projections. MamB-GFP is colored in green; MamJ-mCherry is colored in magenta; White-colored regions in the overlay indicate colocalization. BF, bright field image. (Scale bars: 2  $\mu$ m) **e** Interaction analysis of MamJ using a BACTH assay based on reconstitution of CyaA adenylate cyclase activity in the *cya*<sup>-</sup> strain *E. coli* BTH101. Fusion of proteins to the fragmented catalytic CyaA domains T25 and T18 from *Bordetella pertussis* only confers cAMP-dependent expression of a *lacZ* reporter gene upon protein-protein interaction-mediated reconstitution of CyaA. *lacZ* expression is indicated by blue color formation and enhanced growth on X-Gal containing M63 maltose-mineral salts agar. The MamJ C-terminal domain interacts with MmsF and MmxF but not MamF in BACTH assays. Source data are provided as a Source Data file. **f** Domain structures of putative MFP substrates MamJ, MamD and Mms5 as well as the MamD-homologs MamG and Mms6 which are not targeted to the MM in an MFP-dependent manner (fold change (FC) of the proteomic analysis is indicated; nd, not detected). Alanine and glycine contents of the alanine- (black) and glycine-rich (purple) domains are given in %, respectively. Numbers above and below the proteins represent domain boundaries or protein lengths, respectively. Multiple aa sequence alignment of the glycine-rich domains. Amino acid residues are shaded using the RasMol color scheme. A consensus motif is given below the alignment. The numbers at the beginning and end of each line indicate the position of the first and last amino acid of the respective protein within the alignment. Asterisks indicate the position of conserved glycine residues. **g** Interaction analysis of MamD, Mms5, MamG, Mms6 C-terminal domains using a BACTH assay based on reconstitution of CyaA adenylate cyclase activity in the *cya*<sup>-</sup> strain *E. coli* BTH101. BACTH assay showing the interaction between the C-terminal domains of MamD and Mms5 with MamF, MmsF, and MmxF. Note that the highly homologous proteins MamG and Mms6 do not interact with the MFPs. Source data are provided as a Source Data file.

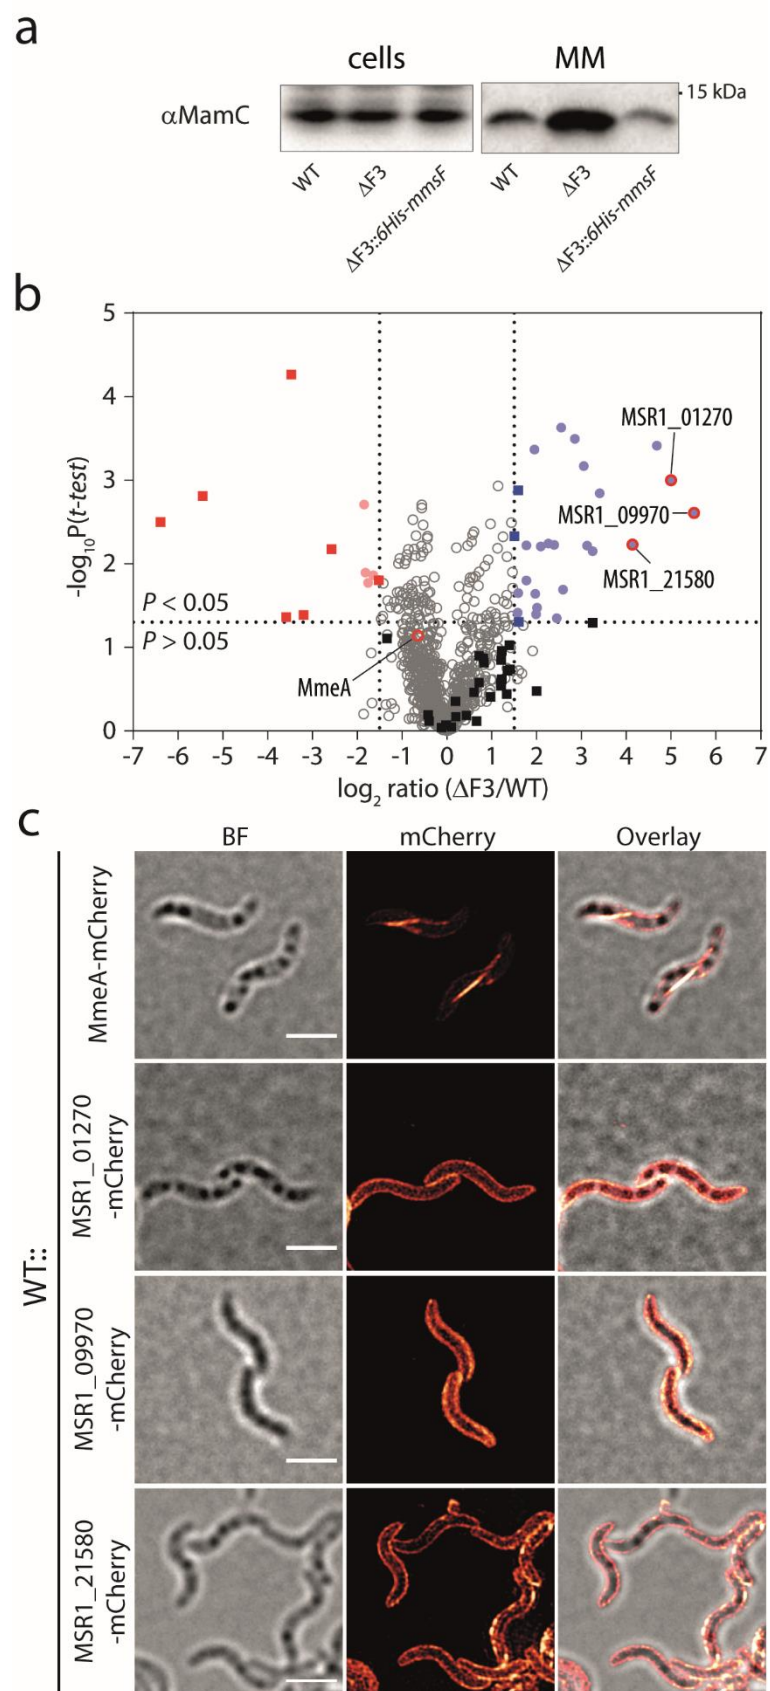

**Supplementary Figure 5. Verification of the proteomic data** **a** Western immunoblot analysis of the WT,  $\Delta F3$  and  $\Delta F3::6\text{His-}mmsF$  strains using MamC antibody confirms the slight enrichment of MamC in magnetosome membrane fractions of  $\Delta F3$  while the cellular levels remained unaltered. Molecular weight standard is indicated. Source data are provided as a Source Data file. **b** Volcano plot showing the  $\log_2$ -fold depletion (red) or enrichment (blue) of proteins in purified magnetosome fractions of  $\Delta F3$  compared to the WT as determined by LC-MS/MS. Circles represent non-MAI encoded proteins, non-significant proteins are depicted by grey or black symbols, respectively. Proteins with predicted N-terminal signal peptide sequences and high enrichment in  $\Delta F3$  used for mCherry-labelling are highlighted (red circles). MmeA, whose abundance remained unaffected in  $\Delta F3$  MM fractions and used as a reference for mCherry labelling is also highlighted. Coloring otherwise identical to **Fig. 3d**. (See also **Supplementary Data 4**. Source data are provided as a Source Data file.) **c** 3D-Structured illumination microscopy confirms that mCherry-labeled proteins (see **Supplementary Fig. 5b**) with potential secretory signal sequences are localized near the cell surface in the MSR-1 WT. However, except for the known magnetosome protein MmeA, no protein showed magnetosome chain localization. BF, bright field image. (Scale bars: 2  $\mu\text{M}$ )

**Supplementary Table 1.** Strains used in this study.

| Strain                                     | Genotype/Description                                                                                                                                                                                                                                                                       | Reference/Source        |
|--------------------------------------------|--------------------------------------------------------------------------------------------------------------------------------------------------------------------------------------------------------------------------------------------------------------------------------------------|-------------------------|
| <i>E. coli</i>                             |                                                                                                                                                                                                                                                                                            |                         |
| DH5α                                       | Host for cloning:<br>F <sup>-</sup> Φ80 <i>lacZ</i> ΔM15 Δ( <i>lacZ</i> YA- <i>argF</i> ) U169 <i>recA1</i><br><i>endA1</i> <i>hsdR17</i> (r <sub>k</sub> <sup>-</sup> , m <sub>k</sub> <sup>+</sup> ) <i>phoA</i> <i>supE44</i> <i>thi-1</i><br><i>gyrA96</i> <i>relA1</i> λ <sup>-</sup> | Invitrogen              |
| WM3064                                     | Donor strain for conjugation:<br><i>thrB1004</i> <i>pro</i> <i>thi</i> <i>rpsL</i> <i>hsdS</i> <i>lacZ</i> ΔM15 RP4-1360<br>Δ( <i>araBAD</i> )567 Δ <i>dapA</i> 1341::[ <i>erm</i> <i>pir</i> (wt)]                                                                                        | William Metcalf at UIUC |
| BTH101                                     | BACTH assay reporter strain:<br>F <sup>-</sup> <i>cya-99</i> <i>araD139</i> <i>galE15</i> <i>galK16</i> <i>rpsL1</i> (Str <sup>R</sup> )<br><i>hsdR2</i> <i>mcrA1</i> <i>mcrB1</i>                                                                                                         | Euromedex               |
| <i>M. gryphiswaldense</i>                  |                                                                                                                                                                                                                                                                                            |                         |
| Wild type (WT)                             | MSR-1 R3/S1; Rif <sup>R</sup> , Sm <sup>R</sup> spontaneous mutant                                                                                                                                                                                                                         | <sup>8</sup>            |
| WT:: <i>mamD-GFP</i>                       | WT with <i>mamD-GFP</i> after Tn5 insertion, Tet <sup>R</sup>                                                                                                                                                                                                                              | This study              |
| WT:: <i>mamR-GFP</i>                       | WT with <i>mamR-GFP</i> after Tn5 insertion, Tet <sup>R</sup>                                                                                                                                                                                                                              | This study              |
| WT:: <i>mms5-GFP</i>                       | WT with <i>mms5-GFP</i> after Tn5 insertion, Tet <sup>R</sup>                                                                                                                                                                                                                              | This study              |
| WT:: <i>mamG-GFP</i>                       | WT with <i>mamG-GFP</i> after Tn5 insertion, Tet <sup>R</sup>                                                                                                                                                                                                                              | This study              |
| WT::P <sub>tet</sub> - <i>mmeA-mCherry</i> | WT with <i>mmeA-mCherry</i><br>after Tn5 insertion, Kan <sup>R</sup>                                                                                                                                                                                                                       | This study              |
| WT:: <i>MSR-1_01270-mCherry</i>            | WT with <i>MSR-1_01270-mCherry</i><br>after Tn7 insertion, Cam <sup>R</sup>                                                                                                                                                                                                                | This study              |
| WT:: <i>MSR-1_09970-mCherry</i>            | WT with <i>MSR-1_09970-mCherry</i><br>after Tn7 insertion, Cam <sup>R</sup>                                                                                                                                                                                                                | This study              |
| WT:: <i>MSR-1_21580-mCherry</i>            | WT with <i>MSR-1_21580-mCherry</i><br>after Tn7 insertion, Cam <sup>R</sup>                                                                                                                                                                                                                | This study              |
| WT:: <i>MSR-1_03900-mCherry</i>            | WT with <i>MSR-1_03900-mCherry</i><br>after Tn7 insertion, Cam <sup>R</sup>                                                                                                                                                                                                                | This study              |
| ΔM05                                       | Non-magnetic mutant with large MAI operon deletions                                                                                                                                                                                                                                        | <sup>9</sup>            |
| ΔM05:: <i>mamJ-GFP</i>                     | ΔM05 with <i>mamJ-GFP</i><br>after Tn5 insertion, Tet <sup>R</sup>                                                                                                                                                                                                                         | This study              |
| Δ <i>mamJ</i>                              | <i>mamJ</i> deletion strain                                                                                                                                                                                                                                                                | <sup>10</sup>           |
| Δ <i>mamJ</i> :: <i>mamJ-GFP</i>           | Δ <i>mamJ</i> with <i>mamJ-GFP</i><br>after Tn5 insertion, Tet <sup>R</sup>                                                                                                                                                                                                                | This study              |
| Δ <i>mamJ</i> :: <i>mamJ1-80-GFP</i>       | Δ <i>mamJ</i> with <i>mamJ1-80-GFP</i><br>after Tn5 insertion, Tet <sup>R</sup>                                                                                                                                                                                                            | This study              |
| Δ <i>mamJ</i> :: <i>mamJ81-333-GFP</i>     | Δ <i>mamJ</i> with <i>mamJ81-333-GFP</i><br>after Tn5 insertion, Tet <sup>R</sup>                                                                                                                                                                                                          | This study              |
| Δ <i>mamJ</i> :: <i>mamJ334-426-GFP</i>    | Δ <i>mamJ</i> with <i>mamJ334-426-GFP</i><br>after Tn5 insertion, Tet <sup>R</sup>                                                                                                                                                                                                         | This study              |
| Δ <i>mamJ</i> :: <i>mamJΔ335-343-GFP</i>   | Δ <i>mamJ</i> with <i>mamJΔ334-343-GFP</i><br>after Tn5 insertion, Tet <sup>R</sup>                                                                                                                                                                                                        | This study              |
| Δ <i>mamJ</i> :: <i>mamJΔ335-348-GFP</i>   | Δ <i>mamJ</i> with <i>mamJΔ334-348-GFP</i><br>after Tn5 insertion, Tet <sup>R</sup>                                                                                                                                                                                                        | This study              |
| Δ <i>mamJ</i> :: <i>mamJΔ335-353-GFP</i>   | Δ <i>mamJ</i> with <i>mamJΔ334-353-GFP</i><br>after Tn5 insertion, Tet <sup>R</sup>                                                                                                                                                                                                        | This study              |
| Δ <i>mamJ</i> :: <i>mamJΔ335-358-GFP</i>   | Δ <i>mamJ</i> with <i>mamJΔ334-358-GFP</i><br>after Tn5 insertion, Tet <sup>R</sup>                                                                                                                                                                                                        | This study              |
| Δ <i>mamJ</i> :: <i>mamJΔ378-426-GFP</i>   | Δ <i>mamJ</i> with <i>mamJΔ378-426-GFP</i><br>after Tn5 insertion, Tet <sup>R</sup>                                                                                                                                                                                                        | This study              |
| Δ <i>mamJ</i> :: <i>mamJΔ396-426-GFP</i>   | Δ <i>mamJ</i> with <i>mamJΔ396-426-GFP</i><br>after Tn5 insertion, Tet <sup>R</sup>                                                                                                                                                                                                        | This study              |
| Δ <i>mamJ</i> :: <i>mamJΔ407-426-GFP</i>   | Δ <i>mamJ</i> with <i>mamJΔ407-426-GFP</i><br>after Tn5 insertion, Tet <sup>R</sup>                                                                                                                                                                                                        | This study              |

| Strain                                               | Genotype/Description                                                                                                                                              | Reference/Source |
|------------------------------------------------------|-------------------------------------------------------------------------------------------------------------------------------------------------------------------|------------------|
| $\Delta mamJ::mamJ\Delta 417-426-GFP$                | $\Delta mamJ$ with <i>mamJ</i> $\Delta 417-426-GFP$ after Tn5 insertion, Tet <sup>R</sup>                                                                         | This study       |
| $\Delta mamJ::mamB-GFP$                              | $\Delta mamJ$ with chromosomally encoded <i>mamB-GFP</i> , expressed from the native <i>mamB</i> locus                                                            | This study       |
| $\Delta mamJ::mamB-GFP::P_{lac}-mamJ334-426-mCherry$ | $\Delta mamJ$ with chromosomally encoded <i>mamB-GFP</i> , expressed from the native <i>mamB</i> locus and <i>mamJ334-426-mCherry</i> inserted into the Tn7 locus | This study       |
| $\Delta mamF$                                        | <i>mamF</i> deletion strain                                                                                                                                       | <sup>11</sup>    |
| $\Delta mmsF$                                        | <i>mmsF</i> deletion strain                                                                                                                                       | <sup>11</sup>    |
| $\Delta mmx F$                                       | <i>mmx F</i> deletion strain                                                                                                                                      | This study       |
| $\Delta mamF/mmsF$                                   | <i>mamF</i> , <i>mmsF</i> double deletion strain                                                                                                                  | <sup>11</sup>    |
| $\Delta mamF/mmx F$                                  | <i>mamF</i> , <i>mmx F</i> double deletion strain                                                                                                                 | This study       |
| $\Delta mmsF/mmx F$                                  | <i>mmsF</i> , <i>mmx F</i> double deletion strain                                                                                                                 | This study       |
| $\Delta mmsF/mmx F::mamJ334-426-GFP$                 | $\Delta mmsF/mmx F$ <i>mamJ334-426</i> after Tn5 insertion, Tet <sup>R</sup>                                                                                      |                  |
| $\Delta F3$                                          | <i>mamF</i> , <i>mmsF</i> , <i>mmx F</i> triple deletion strain                                                                                                   | This study       |
| $\Delta F3::mamF$                                    | Tn5 mediated complementation of $\Delta F3$ with <i>mamF</i> , Tet <sup>R</sup>                                                                                   | This study       |
| $\Delta F3::mmsF$                                    | Tn5 mediated complementation of $\Delta F3$ with <i>mmsF</i> , Tet <sup>R</sup>                                                                                   | This study       |
| $\Delta F3::mmx F$                                   | Tn5 mediated complementation of $\Delta F3$ with <i>mmx F</i> , Tet <sup>R</sup>                                                                                  | This study       |
| $\Delta F3::6His-mmsF$                               | $\Delta F3$ with <i>6His-mmsF</i> after Tn5 insertion, Kan <sup>R</sup>                                                                                           | This study       |
| $\Delta F3::P_{tet}-mCherry-mamK$                    | $\Delta F3$ with inducible <i>mCherry-mamK</i> after Tn5 insertion, Kan <sup>R</sup>                                                                              | This study       |
| $\Delta F3::P_{tet}-mScarlet-I-mamY$                 | $\Delta F3$ with inducible <i>mScarlet-I-mamY</i> after Tn5 insertion, Kan <sup>R</sup>                                                                           | This study       |
| $\Delta F3\Delta mamJ::mamJ-GFP$                     | $\Delta F3\Delta mamJ$ with <i>mamJ-GFP</i> after Tn5 insertion, Tet <sup>R</sup>                                                                                 | This study       |
| $\Delta F3::GFP-mamF$                                | $\Delta F3$ with <i>GFP-mamF</i> after Tn5 insertion, Tet <sup>R</sup>                                                                                            | This study       |
| $\Delta F3::GFP-mmsF$                                | $\Delta F3$ with <i>GFP-mmsF</i> after Tn5 insertion, Tet <sup>R</sup>                                                                                            | This study       |
| $\Delta F3::mamD-GFP$                                | $\Delta F3$ with <i>mamD-GFP</i> after Tn5 insertion, Tet <sup>R</sup>                                                                                            | This study       |
| $\Delta F3::mamR-GFP$                                | $\Delta F3$ with <i>mamR-GFP</i> after Tn5 insertion, Tet <sup>R</sup>                                                                                            | This study       |
| $\Delta F3::mms5-GFP$                                | $\Delta F3$ with <i>mms5-GFP</i> after Tn5 insertion, Tet <sup>R</sup>                                                                                            | This study       |
| $\Delta F3::mamG-GFP$                                | $\Delta F3$ with <i>mamG-GFP</i> after Tn5 insertion, Tet <sup>R</sup>                                                                                            | This study       |
| $\Delta F3::mamD-GFP::mmsF$                          | $\Delta F3$ with <i>mamD-GFP</i> and <i>mmsF</i> after Tn5 insertion, Kan <sup>R</sup> , Tet <sup>R</sup>                                                         | This study       |
| $\Delta F3::mamR-GFP::mmsF$                          | $\Delta F3$ with <i>mamR-GFP</i> and <i>mmsF</i> after Tn5 insertion, Kan <sup>R</sup> , Tet <sup>R</sup>                                                         | This study       |
| $\Delta F3::mms5-GFP::mmsF$                          | $\Delta F3$ with <i>mms5-GFP</i> and <i>mmsF</i> after Tn5 insertion, Kan <sup>R</sup> , Tet <sup>R</sup>                                                         | This study       |
| $\Delta F3::mamG-GFP::mmsF$                          | $\Delta F3$ with <i>mamG-GPF</i> and <i>mmsF</i> after Tn5 insertion, Kan <sup>R</sup> , Tet <sup>R</sup>                                                         | This study       |
| $\Delta F3::mamD-GFP::mamF$                          | $\Delta F3$ with <i>mamD-GFP</i> and <i>mamF</i> after Tn5 insertion, Kan <sup>R</sup> , Tet <sup>R</sup>                                                         | This study       |
| $\Delta F3::mamR-GFP::mamF$                          | $\Delta F3$ with <i>mamR-GFP</i> and <i>mamF</i> after Tn5 insertion, Kan <sup>R</sup> , Tet <sup>R</sup>                                                         | This study       |
| $\Delta F3::mms5-GFP::mamF$                          | $\Delta F3$ with <i>mms5-GFP</i> and <i>mamF</i> after Tn5 insertion, Kan <sup>R</sup> , Tet <sup>R</sup>                                                         | This study       |
| $\Delta F3::mamG-GFP::mamF$                          | $\Delta F3$ with <i>mamG-GPF</i> and <i>mamF</i> after Tn5 insertion, Kan <sup>R</sup> , Tet <sup>R</sup>                                                         | This study       |
| $\Delta F3::mamD-GFP::mmx F$                         | $\Delta F3$ with <i>mamD-GFP</i> and <i>mmx F</i> after Tn5 insertion, Kan <sup>R</sup> , Tet <sup>R</sup>                                                        | This study       |
| $\Delta F3::mamR-GFP::mmx F$                         | $\Delta F3$ with <i>mamR-GFP</i> and <i>mmx F</i> after Tn5 insertion, Kan <sup>R</sup> , Tet <sup>R</sup>                                                        | This study       |

| Strain                                                 | Genotype/Description                                                                                                                                                                                         | Reference/Source |
|--------------------------------------------------------|--------------------------------------------------------------------------------------------------------------------------------------------------------------------------------------------------------------|------------------|
| $\Delta F3::mms5-GFP::mmxF$                            | $\Delta F3$ with <i>mms5-GFP</i> and <i>mmxF</i> after Tn5 insertion, Kan <sup>R</sup> , Tet <sup>R</sup>                                                                                                    | This study       |
| $\Delta F3::mamG-GFP::mmxF$                            | $\Delta F3$ with <i>mamG-GFP</i> and <i>mmxF</i> after Tn5 insertion, Kan <sup>R</sup> , Tet <sup>R</sup>                                                                                                    | This study       |
| $\Delta F3::mmsF^{D34N, D36N, D37N, E38N}$             | $\Delta F3$ with <i>mmsF</i> <sup>D34N, D36N, D37N, E38N</sup> after Tn5 insertion, Tet <sup>R</sup>                                                                                                         | This study       |
| $\Delta F3::mmsF^{D34N, R35Q, D36N, D37N, E38N}$       | $\Delta F3$ with <i>mmsF</i> <sup>D34N, R35Q, D36N, D37N, E38N</sup> after Tn5 insertion, Tet <sup>R</sup>                                                                                                   | This study       |
| $\Delta mamKY$                                         | <i>mamK</i> , <i>mamY</i> double deletion strain                                                                                                                                                             | 12               |
| $\Delta F3\Delta mms5\Delta mamK\Delta mamY::GFP-mmsF$ | <i>mamF</i> , <i>mmsF</i> , <i>mmxF</i> , <i>mms5</i> , <i>mamK</i> , <i>mamY</i> codeletion strain; $\Delta F3\Delta mms5\Delta mamK\Delta mamY$ with <i>GFP-mmsF</i> after Tn5 insertion, Tet <sup>R</sup> | This study       |
| $\Delta A13\Delta mmxF\Delta mms5$                     | <i>mamGFDC</i> , <i>mms5</i> , <i>mms6</i> , <i>mamXY</i> codeletion strain                                                                                                                                  | 13               |
| $\Delta A13\Delta mmxF\Delta mms5\Delta mamR$          | <i>mamGFDC</i> , <i>mms5</i> , <i>mms6</i> , <i>mamXY</i> , <i>MamR</i> codeletion strain                                                                                                                    | This study       |
| $\Delta A13\Delta mmxF\Delta mms5\Delta mamR::mmsF$    | $\Delta A13\Delta mmxF\Delta mms5\Delta mamR$ with <i>mmsF</i> after Tn5 insertion, Tet <sup>R</sup>                                                                                                         | This study       |



**Supplementary Table 2.** Plasmids used in this study.

| Plasmid                                | Description                                                                                                                                        | Reference/Source |
|----------------------------------------|----------------------------------------------------------------------------------------------------------------------------------------------------|------------------|
| pUT18C                                 | BACTH vector designed to express a given polypeptide fused in frame at its N-terminal end with T18 fragment;<br><i>ColE1</i> ori; Amp <sup>R</sup> | 14               |
| pUT18N                                 | BACTH vector designed to express a given polypeptide fused in frame at its C-terminal end with T18 fragment;<br><i>ColE1</i> ori; Amp <sup>R</sup> | 14               |
| pKT25C                                 | BACTH vector designed to express a given polypeptide fused in frame at its N-terminal end with T25 fragment; <i>p15A</i> ori; Kan <sup>R</sup>     | 14               |
| pKT25N                                 | BACTH vector designed to express a given polypeptide fused in frame at its C-terminal end with T25 fragment; <i>p15A</i> ori; Kan <sup>R</sup>     | 14               |
| pUT18C- <i>zip</i> ; pKT25- <i>zip</i> | Derivatives of pUT18C and pKT25 with a 114 bp DNA fragment encoding for a leucine zipper (positive control for BACTH)                              | 14               |
| pUT18C- <i>mamJ</i>                    | BACTH plasmid coding for T18-MamJ                                                                                                                  | 12               |
| pKT25C- <i>mamK</i>                    | BACTH plasmid coding for T25-MamK                                                                                                                  | 12               |
| pKT25C- <i>mamY</i>                    | BACTH plasmid coding for T25-MamY                                                                                                                  | 12               |
| pKT25N- <i>mamJ334-426</i>             | BACTH plasmid coding for MamJ334-426-T25                                                                                                           | This study       |
| pUT18N- <i>mmsF</i>                    | BACTH plasmid coding for MmsF-T18                                                                                                                  | This study       |
| pKT25C- <i>mmsF</i>                    | BACTH plasmid coding for T25-MmsF                                                                                                                  | This study       |
| pUT18N- <i>mmx</i> F                   | BACTH plasmid coding for MmxF-T18                                                                                                                  | This study       |
| pKT25C- <i>mmx</i> F                   | BACTH plasmid coding for T25-MmxF                                                                                                                  | This study       |
| pUT18N- <i>mamF</i>                    | BACTH plasmid coding for MamF-T18                                                                                                                  | This study       |
| pKT25C- <i>mamF</i>                    | BACTH plasmid coding for T25-MamF                                                                                                                  | This study       |
| pUT18N- <i>mms6</i> <sub>CT</sub>      | BACTH plasmid coding for Mms6-T18                                                                                                                  | This study       |
| pUT18N- <i>mamG</i> <sub>CT</sub>      | BACTH plasmid coding for MamG-T18                                                                                                                  | This study       |
| pUT18N- <i>mamD</i> <sub>CT</sub>      | BACTH plasmid coding for MamD-T18                                                                                                                  | This study       |
| pUT18N- <i>mms5</i> <sub>CT</sub>      | BACTH plasmid coding for Mms5-T18                                                                                                                  | This study       |
| pBAM-Tet- <i>mamD</i> -GFP             | <i>R6K</i> ori, Tn5, Amp <sup>R</sup> , Tet <sup>R</sup> , P <sub><i>mamG</i></sub> - <i>mamD</i> -GFP                                             | 15               |
| pBAM-Tet- <i>mamR</i> -GFP             | <i>R6K</i> ori, Tn5, Amp <sup>R</sup> , Tet <sup>R</sup> , P <sub><i>mamG</i></sub> - <i>mamR</i> -GFP                                             | This study       |
| pBAM-Tet- <i>mms5</i> -GFP             | <i>R6K</i> ori, Tn5, Amp <sup>R</sup> , Tet <sup>R</sup> , P <sub><i>mamG</i></sub> - <i>mms5</i> -GFP                                             | This study       |
| pBAM-Tet- <i>mamG</i> -GFP             | <i>R6K</i> ori, Tn5, Amp <sup>R</sup> , Tet <sup>R</sup> , P <sub><i>mamG</i></sub> - <i>mamG</i> -GFP                                             | This study       |
| pBAM-Tet- <i>mamJ</i> -GFP             | <i>R6K</i> ori, Tn5, Amp <sup>R</sup> , Tet <sup>R</sup> , P <sub><i>mamG</i></sub> - <i>mamJ</i> -GFP                                             | 16               |
| pBAM-Tet- <i>mamJ1-80</i> -GFP         | <i>R6K</i> ori, Tn5, Amp <sup>R</sup> , Tet <sup>R</sup> ,<br>P <sub><i>mamG</i></sub> - <i>mamJ1-80</i> -GFP                                      | This study       |
| pBAM-Tet- <i>mamJ81-333</i> -GFP       | <i>R6K</i> ori, Tn5, Amp <sup>R</sup> , Tet <sup>R</sup> ,<br>P <sub><i>mamG</i></sub> - <i>mamJ81-333</i> -GFP                                    | This study       |
| pBAM-Tet- <i>mamJ335-426</i> -GFP      | <i>R6K</i> ori, Tn5, Amp <sup>R</sup> , Tet <sup>R</sup> ,<br>P <sub><i>mamG</i></sub> - <i>mamJ335-426</i> -GFP                                   | This study       |
| pBAM-Tet- <i>mamJΔ335-343</i> -GFP     | <i>R6K</i> ori, Tn5, Amp <sup>R</sup> , Tet <sup>R</sup> ,<br>P <sub><i>mamG</i></sub> - <i>mamJΔ335-343</i> -GFP                                  | This study       |
| pBAM-Tet- <i>mamJΔ335-348</i> -GFP     | <i>R6K</i> ori, Tn5, Amp <sup>R</sup> , Tet <sup>R</sup> ,<br>P <sub><i>mamG</i></sub> - <i>mamJΔ335-348</i> -GFP                                  | This study       |
| pBAM-Tet- <i>mamJΔ335-353</i> -GFP     | <i>R6K</i> ori, Tn5, Amp <sup>R</sup> , Tet <sup>R</sup> ,<br>P <sub><i>mamG</i></sub> - <i>mamJΔ335-353</i> -GFP                                  | This study       |

| Plasmid                                                       | Description                                                                                                                | Reference/Source |
|---------------------------------------------------------------|----------------------------------------------------------------------------------------------------------------------------|------------------|
| pBAM-Tet- <i>mamJ</i> Δ334-359- <i>GFP</i>                    | <i>R6K</i> ori, Tn5, Amp <sup>R</sup> , Tet <sup>R</sup> ,<br><i>P<sub>mamG</sub>-mamJ</i> Δ335-358- <i>GFP</i>            | This study       |
| pBAM-Tet- <i>mamJ</i> Δ378-426- <i>GFP</i>                    | <i>R6K</i> ori, Tn5, Amp <sup>R</sup> , Tet <sup>R</sup> ,<br><i>P<sub>mamG</sub>-mamJ</i> Δ378-426- <i>GFP</i>            | This study       |
| pBAM-Tet- <i>mamJ</i> Δ396-426- <i>GFP</i>                    | <i>R6K</i> ori, Tn5, Amp <sup>R</sup> , Tet <sup>R</sup> ,<br><i>P<sub>mamG</sub>-mamJ</i> Δ396-426- <i>GFP</i>            | This study       |
| pBAM-Tet- <i>mamJ</i> Δ407-426- <i>GFP</i>                    | <i>R6K</i> ori, Tn5, Amp <sup>R</sup> , Tet <sup>R</sup> ,<br><i>P<sub>mamG</sub>-mamJ</i> Δ407-426- <i>GFP</i>            | This study       |
| pBAM-Tet- <i>mamJ</i> Δ417-426- <i>GFP</i>                    | <i>R6K</i> ori, Tn5, Amp <sup>R</sup> , Tet <sup>R</sup> ,<br><i>P<sub>mamG</sub>-mamJ</i> Δ417-426- <i>GFP</i>            | This study       |
| pBAM-Tet- <i>GFP-mmsF</i>                                     | <i>R6K</i> ori, Tn5, Amp <sup>R</sup> , Tet <sup>R</sup> , <i>P<sub>mamG</sub>-GFP-mmsF</i>                                | This study       |
| pBAM-Tet- <i>GFP-mamF</i>                                     | <i>R6K</i> ori, Tn5, Amp <sup>R</sup> , Tet <sup>R</sup> , <i>P<sub>mamG</sub>-GFP-mamF</i>                                | This study       |
| pBAM-Tet- <i>mmsF</i>                                         | <i>R6K</i> ori, Tn5, Amp <sup>R</sup> , Tet <sup>R</sup> , <i>P<sub>mamG</sub>-mmsF</i>                                    | This study       |
| pBAM-Tet- <i>mamF</i>                                         | <i>R6K</i> ori, Tn5, Amp <sup>R</sup> , Tet <sup>R</sup> , <i>P<sub>mamG</sub>-mamF</i>                                    | This study       |
| pBAM-Tet- <i>mmxF</i>                                         | <i>R6K</i> ori, Tn5, Amp <sup>R</sup> , Tet <sup>R</sup> , <i>P<sub>mamG</sub>-mmxF</i>                                    | This study       |
| pBAM-Tet- <i>mmsF</i> <sup>D34N, D36N, D37N, E38N</sup>       | <i>R6K</i> ori, Tn5, Amp <sup>R</sup> , Tet <sup>R</sup> , <i>P<sub>mamG</sub>-mmsF</i>                                    | This study       |
| pBAM-Tet- <i>mmsF</i> <sup>D34N, R35Q, D36N, D37N, E38N</sup> | <i>R6K</i> ori, Tn5, Amp <sup>R</sup> , Tet <sup>R</sup> , <i>P<sub>mamG</sub>-mmsF</i>                                    | This study       |
| pBAM1- <i>mmsF</i>                                            | <i>R6K</i> ori, Tn5, Amp <sup>R</sup> , Kan <sup>R</sup> , <i>P<sub>mamG</sub>-mmsF</i>                                    | This study       |
| pBAM1- <i>mamF</i>                                            | <i>R6K</i> ori, Tn5, Amp <sup>R</sup> , Kan <sup>R</sup> , <i>P<sub>mamG</sub>-mamF</i>                                    | This study       |
| pBAM1- <i>mmxF</i>                                            | <i>R6K</i> ori, Tn5, Amp <sup>R</sup> , Kan <sup>R</sup> , <i>P<sub>mamG</sub>-mmxF</i>                                    | This study       |
| pBAM2-His <sub>6</sub> - <i>mmsF</i>                          | <i>p15A</i> ori, Tn5, Amp <sup>R</sup> , Kan <sup>R</sup> <i>P<sub>mamG</sub>-6His-mmsF</i>                                | This study       |
| pBAM2-MSR-1_09970-mCherry                                     | <i>p15A</i> ori, Tn7, Amp <sup>R</sup> , Cam <sup>R</sup> ,<br><i>P<sub>G</sub>-MSR-1_09970-mCherry</i>                    | This study       |
| pBAM2-MSR-1_01270-mCherry                                     | <i>p15A</i> ori, Tn7, Amp <sup>R</sup> , Cam <sup>R</sup> ,<br><i>P<sub>G</sub>-MSR-1_01270-mCherry</i>                    | This study       |
| pBAM2-MSR-1_21580-mCherry                                     | <i>p15A</i> ori, Tn7, Amp <sup>R</sup> , Cam <sup>R</sup> ,<br><i>P<sub>G</sub>-MSR-1_21580-mCherry</i>                    | This study       |
| pBAM2-MSR-1_03900-mCherry                                     | <i>p15A</i> ori, Tn7, Amp <sup>R</sup> , Cam <sup>R</sup> ,<br><i>P<sub>G</sub>-MSR-1_03900-mCherry</i>                    | This study       |
| pBAM2- <i>mamJ</i> Δ334-426-mCherry                           | <i>p15A</i> ori, Tn7, Amp <sup>R</sup> , Cam <sup>R</sup> ,<br><i>P<sub>lac</sub>-mamJ</i> Δ334-426-mCherry                | This study       |
| pBAM160- <i>mamA</i> - <i>GFP</i>                             | <i>R6K</i> ori, Tn5, Amp <sup>R</sup> , Kan <sup>R</sup> , <i>P<sub>tet</sub>-mamA-GFP</i>                                 | 17               |
| pBAM160-mCherry- <i>mamK</i>                                  | <i>R6K</i> ori, Tn5, Amp <sup>R</sup> , Kan <sup>R</sup> , <i>P<sub>tet</sub>-mCherry-mamK</i>                             | This study       |
| pBAM160- <i>mmeA</i> -mCherry                                 | <i>R6K</i> ori, Tn5, Amp <sup>R</sup> , Kan <sup>R</sup> ,<br><i>P<sub>tet</sub>-mmeA-mCherry</i>                          | This study       |
| pBAM160-mScarlet-I- <i>mamY</i>                               | <i>R6K</i> ori, Tn5, Amp <sup>R</sup> , Kan <sup>R</sup> ,<br><i>P<sub>tet</sub>-mScarlet-I-mamY</i>                       | This study       |
| pORFM-GalK-MCS                                                | universal in-frame deletion/in-frame fusion<br>vector for GalK counterselection;<br><i>npt galK Tet<sup>R</sup> mobRK2</i> | 18               |
| pOR-Δ <i>mamR</i>                                             | pORFM-GalK-MCS with<br>Δ <i>mamR</i> deletion construct                                                                    | This study       |
| pOR-Δ <i>mamJ</i>                                             | pORFM-GalK-MCS with<br>Δ <i>mamJ</i> deletion construct                                                                    | This study       |
| pOR- <i>mamB</i> - <i>GFP</i>                                 | pORFM-GalK-MCS with<br><i>mamB-GFP</i> insertion construct                                                                 | This study       |

**Supplementary Table 3. PCR Primers used in this study.**

| Oligonucleotides          | Sequence                             | Source     |
|---------------------------|--------------------------------------|------------|
| dmmx <sub>F</sub> _do_for | CCGAAGCCGTCTGATGCTGAACGGATCCGCCGCGCC | This study |
| dmmx <sub>F</sub> _do_rev | CATCATCGGCAAGGAGGCGCAGA              | This study |
| dmmx <sub>F</sub> _up_rev | GGATCCGTTCAGCATCAGACGGCTTCGGCCGCAGC  | This study |
| dmmx <sub>F</sub> _up_for | CCGCAGCTCCCGCAGCTGGC                 | This study |
| MamR_Kpn_for              | GGTACCATGATTTGGACAGCAGTGATC          | This study |
| MamR-GFP_SacI_rev         | GAGCTCTCACTTATACAGCTCGTCCATGC        | This study |
| MmsF_Kpn_for              | GGTACCATGGTTGAAGCAATCCTTCG           | This study |
| MamF_Sac_rev              | GAGCTCTCAGATCAGGGCGACTACAT           | This study |
| MmeA_NdeI_for             | CATATGGCCCTGAAGACGACCCATGC           | This study |
| MmeAoStop_SacI_rev        | GAGCTCGCGAACGTAGACCTGCACCT           | This study |
| mms6_C-term2_for          | AGGCTGTCTGGCGGCACCATC                | This study |
| mms6_C-term2_rev          | GGGACAGCGCGTCGCGCAG                  | This study |
| mamG_C-term_for           | AGGCTGTCTGGCAGCACCTTG                | This study |
| mamG_C-term_rev           | GAGCAGGCTCGGCGGAGGC                  | This study |
| mamD_C-term2_for          | AGGCCGCTGGCAGCGCCATG                 | This study |
| mamD_C-term2_rev          | GTTCTCGCCGACAGCCGCCAGAA              | This study |
| mms5_C-term2_for          | AGACCAGCAGCAGCGCCATGCT               | This study |
| mms5_C-term2_rev          | GGACGGCTTCGGCCGCAGC                  | This study |
| MmsF_for                  | AGGTTGAAGCAATCCTTCGG                 | This study |
| MmsF_rev                  | GGATCCGGTCGGCCACCCA                  | This study |
| MamF_for                  | AGGCCGAGACTATTTTGATC                 | This study |
| MamF_rev                  | GGATCAGGGCGACTACATG                  | This study |
| Mmx <sub>F</sub> _for     | AGATCGCACAGACTGTCTGGG                | This study |
| Mmx <sub>F</sub> _rev     | GGATGCGGTCTGGCGATATA                 | This study |
| MamY_oStop_Kpn_rev        | GATCGGTACCCGCATCGGAGATGGGGGTT        | This study |
| MamY_Nde_for              | CGTACATATGTTGATGAACTTTGTCAACAATG     | This study |
| mamJ_1-80.FOR             | GTAACATATGGCAAAAAACCGCGTGATCGC       | This study |
| mamJ_335-392.FOR          | GCCTCATATGACCCGCCAGCCTAACAAGAT       | This study |
| mamJ_335-392.REV          | GCTGGGTACCTTTATCTTATCTTCAGCATCACAT   | This study |
| mamJ_1-80.REV             | ACGAGGTACCGTCCTGGGAACGAATGGG         | This study |
| MamJ-E294_NdeI_for        | GATCAGCATATGGAGAGCGTTGCATCAGCG       | This study |
| MamJ-E333_KpnI_rev        | GCTACGGGTACCTTCGACCGCCACAGCAAC       | This study |
| MamJ-A334_NdeI_for        | GATCAGCATATGGCCACCCGCCAGCCTAAC       | This study |
| MamJ-F364_KpnI_rev        | GCTACGGGTACCGAAAATCCCCCCCAGAAGGT     | This study |
| MamJ-G365_NdeI_for        | GATCAGCATATGGGCGTCGCCGGATCGGCG       | This study |
| MamJ-N395_KpnI_rev        | GCTACGGGTACCATTGCTTCCAACGAGGCGGCCTCC | This study |
| MamJ-V396_NdeI_for        | GATCAGCATATGGTGGTCGCCGGGACGCGC       | This study |
| MamJ-CAR_for              | GATCAGCATATGCCTGTGCCGTTGCCGATC       | This study |
| MamJ-CAR_rev              | GCTACGGGTACCTTCGACCGCCACAGCAAC       | This study |
| MamJ1-80_NdeI_rev         | GCTGACATATGGTCCTGGGAACGAATGGG        | This study |
| MamJ344S_for              | TCAGTTAAGAAGCGCGCCC                  | This study |
| MamJ349A_for              | GCCCCGGTTCAGGAAGTTC                  | This study |
| MamJ354V_for              | GTTCCCGTGGAAGACCTTCTG                | This study |
| MamJ359L_for              | CTTCTGGGGGGGATTTTCG                  | This study |
| Kpn-10G_for               | GGTACCGGAGGCGGAGGCG                  | This study |
| MamJ416S_rev              | CGATGAACAACCTACCGCAACTTACCTC         | This study |
| MamJ406T_rev              | AGTTTGCGCCAACC GGCGC                 | This study |
| MamJ386V_rev              | GACCACTCCATCGACGAATCCG               | This study |

| Oligonucleotides   | Sequence                                              | Source     |
|--------------------|-------------------------------------------------------|------------|
| MamJ376T_rev       | AGTGAACACACCCCGCACCG                                  | This study |
| 6His-MmsF-NdeI_for | AATTCATATGCATCACCACCATCATCACGTTGAAGCAATCCTT<br>CGGAGC | This study |
| 6His-MamF-NdeI_for | AATTCATATGCATCACCACCATCATCACGCCGAGACTATTTTG<br>ATC    | This study |
| MmsF_SphI_rev      | TAAGGCATGCTCAGATCCGGTCGGCCACCCA                       | This study |
| MamF_SphI_rev      | TAAGGCATGCTCAGATCAGGGCGACTACATG                       | This study |
| MamJS410_SmaI_rev  | CCCGGGCACTTACCTCGATAGTTTGCGC                          | This study |
| MamJA334_for       | AGGCCACCCGCCAGCCTAAC                                  | This study |
| MamJ_rev           | GTTTATTCTTATCTTCAGCATCACATTTTCG                       | This study |
| Mms5_SacI_rev      | GAGCTCTCAGACGGCTTCGGCCGC                              | This study |
| Mms5_KpnI_for      | GGTACCATGGCTGGTGGGACCGCG                              | This study |
| MmxF_SacI_rev      | GAGCTCTCAGATGCGGTCGGCGAT                              | This study |
| MmxF_KpnI_for      | GGTACCATGATCGCACAGACTGTCTG                            | This study |
| MamF_KpnI_for      | GGTACCATGGCCGAGACTATTTTG                              | This study |
| MamF_SacI_rev      | GAGCTCTCAGATCAGGGCGACTAC                              | This study |
| MmsF_SacI_rev      | GAGCTCTCAGATCCGGTCGGCCAC                              | This study |
| MmsF_KpnI_for      | GGTACCATGGTTGAAGCAATCCTTCG                            | This study |

**Supplementary Table 4.** Media and buffers used in this study.

| Component                                                   | Final concentration     |
|-------------------------------------------------------------|-------------------------|
| MSR-1 flask standard medium (FSM) pH 7                      |                         |
| HEPES                                                       | 10 mM                   |
| Potassium lactate                                           | 12 mM                   |
| NaNO <sub>3</sub>                                           | 4 mM                    |
| KH <sub>2</sub> PO <sub>4</sub>                             | 0.74 mM                 |
| MgSO <sub>4</sub> · 7 H <sub>2</sub> O                      | 0.60 mM                 |
| Fe(III)-citrate                                             | 50 µM                   |
| Yeast extract                                               | 0.01% (w/v)             |
| Soybean peptone                                             | 0.3% (w/v)              |
| MSR-1 soft agar pH 7                                        |                         |
| HEPES                                                       | 10 mM                   |
| Potassium lactate                                           | 1.5 mM                  |
| NaNO <sub>3</sub>                                           | 4 mM                    |
| KH <sub>2</sub> PO <sub>4</sub>                             | 0.74 mM                 |
| MgSO <sub>4</sub> · 7 H <sub>2</sub> O                      | 0.60 mM                 |
| Fe(III)-citrate                                             | 50 µM                   |
| Yeast extract                                               | 0.01% (w/v)             |
| Soybean peptone                                             | 0.3% (w/v)              |
| Agar                                                        | 0.2% agar (w/v)         |
| Agar for Bacterial two-hybrid assays                        |                         |
| X-Gal                                                       | 40 µg mL <sup>-1</sup>  |
| IPTG                                                        | 0.5 mM                  |
| Amicillin                                                   | 100 µg mL <sup>-1</sup> |
| Kanamycin                                                   | 50 µg mL <sup>-1</sup>  |
| LB medium for Bacterial two-hybrid assays supplemented with |                         |
| IPTG                                                        | 0.5 mM                  |
| Amicillin                                                   | 100 µg mL <sup>-1</sup> |
| Kanamycin                                                   | 50 µg mL <sup>-1</sup>  |
| M 63 Agar for Bacterial two-hybrid assays                   |                         |
| X-Gal                                                       | 40 µg mL <sup>-1</sup>  |
| IPTG                                                        | 0.5 mM                  |
| Amicillin                                                   | 50 µg mL <sup>-1</sup>  |
| Kanamycin                                                   | 25 µg mL <sup>-1</sup>  |
| Maltose                                                     | 0.2% (w/v)              |
| Buffer W pH 7.4                                             |                         |
| HEPES                                                       | 20 mM                   |
| EDTA                                                        | 5 mM                    |
| Buffer R pH 7.4                                             |                         |
| HEPES                                                       | 50 mM                   |
| EDTA                                                        | 1 mM                    |
| PMSF                                                        | 0.1 mM                  |
| Buffer E pH 7.4                                             |                         |
| HEPES                                                       | 10 mM                   |
| EDTA                                                        | 1 mM                    |
| Buffer S pH 7.4                                             |                         |
| HEPES                                                       | 10 mM                   |
| EDTA                                                        | 1 mM                    |
| NaCl                                                        | 200 mM                  |

| Component                                                   | Final concentration        |
|-------------------------------------------------------------|----------------------------|
| 5x SDS sample buffer pH 6.8                                 |                            |
| SDS                                                         | 10% (w/v)                  |
| $\beta$ -mercaptoethanol                                    | 25% (v/v)                  |
| Glycerol                                                    | 25% (v/v)                  |
| Bromophenol blue                                            | 0.05%                      |
| Tris/HCl                                                    | 0.3 M                      |
| 2x SDS sample buffer pH 6.8                                 |                            |
| SDS                                                         | 0.2% (w/v)                 |
| DTT                                                         | 200 mM                     |
| Glycerol                                                    | 20% (v/v)                  |
| Bromophenol blue                                            | 0.2%                       |
| Tris                                                        | 100 mM                     |
| Coomassie staining solution                                 |                            |
| Methanol                                                    | 50% (v/v)                  |
| Acetic acid                                                 | 10% (v/v)                  |
| Coomassie R-250                                             | 0.1% (w/v)                 |
| Coomassie washing solution                                  |                            |
| Methanol                                                    | 10% (v/v)                  |
| Acetic acid                                                 | 7% (v/v)                   |
| Silver-stain fixing solution                                |                            |
| Methanol                                                    | 40% (v/v)                  |
| Formaldehyde                                                | 36.5% (v/v) of 37% (w/v)   |
| Silver-stain incubation solution                            |                            |
| Thiosulfate                                                 | 0.02% (w/v)                |
| Silver-stain impregnation solution                          |                            |
| AgNO <sub>3</sub>                                           | 0.1% (w/v)                 |
| Silver-stain developing solution                            |                            |
| Na <sub>2</sub> S <sub>2</sub> O <sub>3</sub>               | 0.02% (v/v) of 0.02% (w/v) |
| Na <sub>2</sub> CO <sub>3</sub>                             | 3% (w/v)                   |
| Formaldehyde                                                | 0.135% (v/v) of 37% (w/v)  |
| Silver-stain stopping solution                              |                            |
| EDTA                                                        | 1.86% (w/v)                |
| Buffer E for protein complex purification supplemented with |                            |
| NaCl                                                        | 50 mM                      |
| LMNG                                                        | 0.1% (w/v)                 |
| Buffer E for protein complex purification supplemented with |                            |
| NaCl                                                        | 50 mM                      |
| LMNG                                                        | 0.1% (w/v)                 |
| Extraction buffers                                          |                            |
| - NaCO <sub>3</sub> pH 11.3                                 | 100 mM                     |
| - Buffer E supplemented with SDS                            | 1%                         |
| - CAPS-NaOH pH 11                                           | 0.1 M                      |
| - Glycine-HCl pH 2.5                                        | 0.1 M                      |
| - HEPES                                                     | 10 mM                      |
| EDTA                                                        | 1 mM                       |
| NaCl                                                        | 1M                         |
| pH7.4                                                       |                            |
| Precipitation buffer                                        |                            |
| Acetone                                                     | 90% (v/v)                  |
| TCA                                                         | 10% (v/v)                  |

| Component       | Final concentration |
|-----------------|---------------------|
| NaCl            | 10 mM               |
| Buffer 1 pH 7.4 |                     |
| HEPES           | 10 mM               |
| EDTA            | 1 mM                |
| NaCl            | 50 mM               |
| PMSF            | 0.1 mM              |
| Triton X-100    | 0.5% (v/v)          |
| Buffer 2 pH 7.4 |                     |
| HEPES           | 10 mM               |
| EDTA            | 1 mM                |
| NaCl            | 50 mM               |
| PMSF            | 0.1 mM              |
| Triton X-100    | 0.1% (v/v)          |
| Buffer A        |                     |
| Acetic acid     | 0.1% (v/v)          |
| Buffer B        |                     |
| Acetic acid     | 0.1% (v/v)          |
| Acetonitrile    | 99.9% (v/v)         |



## Supplementary References

1. Scheffel, A., Gärdes, A., Grünberg, K., Wanner, G. & Schüler, D. The major magnetosome proteins MamGFDC are not essential for magnetite biomineralization in *Magnetospirillum gryphiswaldense* but regulate the size of magnetosome crystals. *J. Bacteriol.* **190**, 377–386, (2008).
2. Lohße, A. *et al.* Functional analysis of the magnetosome island in *Magnetospirillum gryphiswaldense*: the *mamAB* operon is sufficient for magnetite biomineralization. *PLoS One* **6**, e25561, (2011).
3. Raschdorf, O., Müller, F. D., Pósfai, M., Plitzko, J. M. & Schüler, D. The magnetosome proteins MamX, MamZ and MamH are involved in redox control of magnetite biomineralization in *Magnetospirillum gryphiswaldense*. *Mol. Microbiol.* **89**, 872–886, (2013).
4. Almagro Armenteros, J. J. *et al.* SignalP 5.0 improves signal peptide predictions using deep neural networks. *Nat. Biotechnol.* **37**, 420–423, (2019).
5. Richter, M. *et al.* Comparative genome analysis of four magnetotactic bacteria reveals a complex set of group-specific genes implicated in magnetosome biomineralization and function. *J. Bacteriol.* **189**, 4899–4910, (2007).
6. Möglich, A. An Open-Source, Cross-Platform Resource for Nonlinear Least-Squares Curve Fitting. *J. Chem. Educ.* **95**, 2273–2278 (2018).
7. Ducret, A., Quardokus, E. M. & Brun, Y. V. MicrobeJ, a tool for high throughput bacterial cell detection and quantitative analysis. *Nat. Microbiol.* **1**, 16077 (2016).
8. Schultheiss, D., Kube, M. & Schüler, D. Inactivation of the flagellin gene *flaA* in *Magnetospirillum gryphiswaldense* results in nonmagnetotactic mutants lacking flagellar filaments. *Appl. Environ. Microbiol.* **70**, 3624–3631, (2004).
9. Dziuba, M. V., Zwiener, T., Uebe, R. & Schüler, D. Single-step transfer of biosynthetic operons endows a non-magnetotactic *Magnetospirillum* strain from wetland with magnetosome biosynthesis. *Environ. Microbiol.* **22**, 1603–1618, (2020).
10. Scheffel, A. *et al.* An acidic protein aligns magnetosomes along a filamentous structure in magnetotactic bacteria. *Nature* **440**, 110–114 (2006).
11. Lohße, A. *et al.* Genetic dissection of the *mamAB* and *mms6* operons reveals a gene set essential for magnetosome biogenesis in *Magnetospirillum gryphiswaldense*. *J. Bacteriol.* **196**, 2658–2669, (2014).
12. Toro-Nahuelpan, M. *et al.* MamY is a membrane-bound protein that aligns magnetosomes and the motility axis of helical magnetotactic bacteria. *Nat. Microbiol.* **4**, 1978–1989, (2019).
13. Zwiener, T. *et al.* Identification and elimination of genomic regions irrelevant for magnetosome biosynthesis by large-scale deletion in *Magnetospirillum gryphiswaldense*. *BMC Microbiol.* **21**, 65, (2021).
14. Karimova, G., Pidoux, J., Ullmann, A. & Ladant, D. A bacterial two-hybrid system based on a reconstituted signal transduction pathway. *PNAS* **95**, 5752–5756, (1998).
15. Uebe, R. *et al.* The dual role of MamB in magnetosome membrane assembly and magnetite biomineralization. *Mol. Microbiol.* **107**, 542–557, (2018).

16. Kolinko, I. *et al.* Biosynthesis of magnetic nanostructures in a foreign organism by transfer of bacterial magnetosome gene clusters. *Nat. Nanotechnol.* **9**, 193–197, (2014).
17. Pfeiffer, D. *et al.* A bacterial cytolinker couples positioning of magnetic organelles to cell shape control. *PNAS* **117**, 32086–32097, (2020).
18. Raschdorf, O., Plitzko, J. M., Schüler, D. & Müller, F. D. A tailored *galK* counterselection system for efficient markerless gene deletion and chromosomal tagging in *Magnetospirillum gryphiswaldense*. *Appl. Environ. Microbiol.* **80**, 4323–4330, (2014).
